# Supplementary material for: Syntenin, a syndecan adaptor and an Arf6 phosphatidylinositol 4,5-bisphosphate effector, is essential for epiboly and gastrulation cell movements in zebrafish
Source: Oxford University Press journal article supplement (doi:10.1242/jcs.089987), 2012-03-01
Supplement: jcs089987figs1-s4.pdf [file jcs089987figs1-s4.pdf]

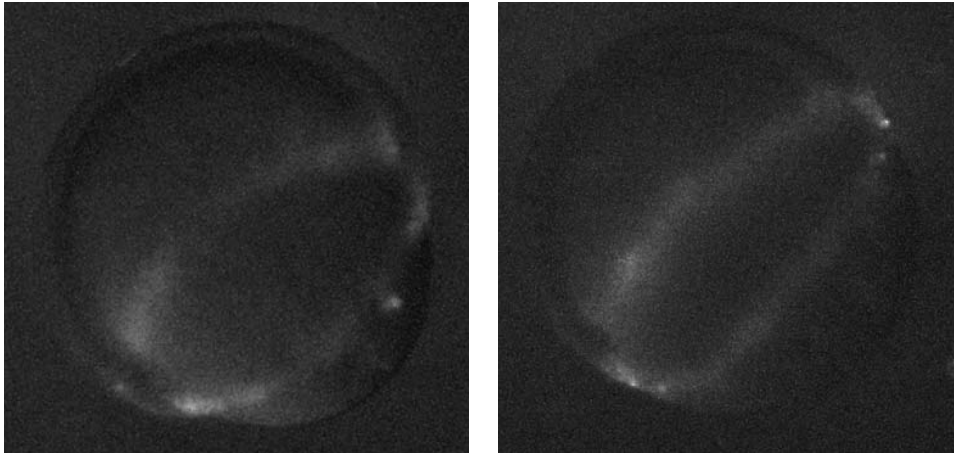

**Fig. S2. The process of YSL endocytosis is not disrupted in Syntenin-a morphants.** Views of embryos at 6.7 hpf incubated with Rhodamine-dextran showing the endocytic ring in control (left) and in 6 ng syntaMO-injected (right) embryos. To label endocytic vesicles, embryos at shield stage were placed in a 10 mg/ml solution of Rhodamine-labeled dextran (10.000 MW, Molecular probes). After 30 min of loading, embryos were washed and analysed immediately. Microscopic analyses were performed with a Leica Fluo Combi stereomicroscope connected to a Leica DC300 F camera.

```

atg aag ctc ccg tgc tgg ata acg ctg ctg ctg ctg cag acc gca ctg gcc cag cac agc aaa tct caa cca agt gat gat gag agc tct
M K L P C W I T L L L L Q T A L A Q H S K S Q P S D D E S S
gga gat gag cct tac gat gat gaa gac ttc tac tct gga tcc ggc tct ggc tat cca gat ata aaa gtt aga ccg tct tca gtg ggc gtg
G D E P Y D D E D F Y S G S G S G Y P D I K V R P S S V G V
ggt ttc act aca gag gag ccc ctc cca ctc tcc acc acc cag gcc aca ggc cct gcc ccc tcg gcc tct cct gca gca gag cca agc agt
V F T T E E P L P L S T T T Q A T G P A P S A S P A A E P S S
ccg cct cca ccc gag gta gag cgg gag agc ggt ttg ggt caa gat gtc gac agc aaa cta gaa att gag aaa aag tat gaa gag tat gac
P P P P E V E R E S G L G Q D V D S K L E I E K K Y E E Y D
gag gag gaa gaa att cgg cca acg agg aag gag cag gaa cct gat act gag aaa gta caa gag cga gag caa gat cgg tcg aag gct aca
E E E E I R P T R K E Q E P D T E K V Q E R E Q D R S K A T
ggt gcg cca cga ctg act gac gtt cct ata gtg ttt ttg ggc tcc tct act gtt ggt gga gcc aca gag acc act act gac ctc gag gat
V A P R L T D V P I V F L G S S T V G G A T E T T T D L E D
ctc ggc gcc aga gaa gaa aca gat gaa gat ctg tat att act aaa gaa act atc gtt tta gat cca tcc agc gag aca gat atg ata
L G G R E E E T D E D L Y I T K E I V L D P S S E T D M I
acc gat gag atc aca acc acc gag ttt ata ccc acc acc att cca tcc acc act gct aaa ccg acc agg cca cgt cct att ctg acc act
T D E I T T T E F I P T T I P S T T A K P T R P R P I L T T
cca agc ccc acc gct gtg cgc ccc agg caa cca cag acc acg ccc agc aga gcc gct ccg acc gag agc agc act cgt tca gtg atg acc
P S P T A V R P R Q P Q T T P S R A A P T E S S T R S V M T
aca aca cag acg caa gtg cca gat gaa act gta aat aat gaa gtc gca ggg ccg ggt cca agt gga gat ttc gaa atc cgc gag aat gag
T T Q T Q V P D E T V N N E V A G P G P S G D F E I R E N E
gtc gcg cag aac aat gat ctg ggg cga ggc cga gcg gtg cca gga gag ccg gat ctg acc gga aac aca gtt gat gct gct gga agt tca
V R Q N N D L G R G R A V P G E P D L T G N T V D A A G S S
gct gca cag ctt cca cag aag aac atc ctc gag agg aag gag gtt ttg ata gcg gtg atc gtc gga ggt gta gtc ggc gct ctc ttc gcc
A A Q L P Q K N I L E R K E V L I A V I V G G V V G A L F A
gcg ttc ctg gta atg tta ctc gtc tac ccg atg aaa aag aaa gac gaa ggc agc tac aca ttg gag gag cct aaa caa gcc acc gtt acc
A F L V M L L V Y R M K K K D E G S Y T L E E P K Q A T V T
tac cag aaa cca gac aag cag gag gaa ttc tac gcc taa
Y Q K P D K Q E E F Y A *

```

**Fig. S3** cDNA and protein sequence of zebrafish syndecan-3. Regions corresponding to putative attachment sites for heparan sulfate chains and to predicted transmembrane and cytoplasmic domains are underlined.

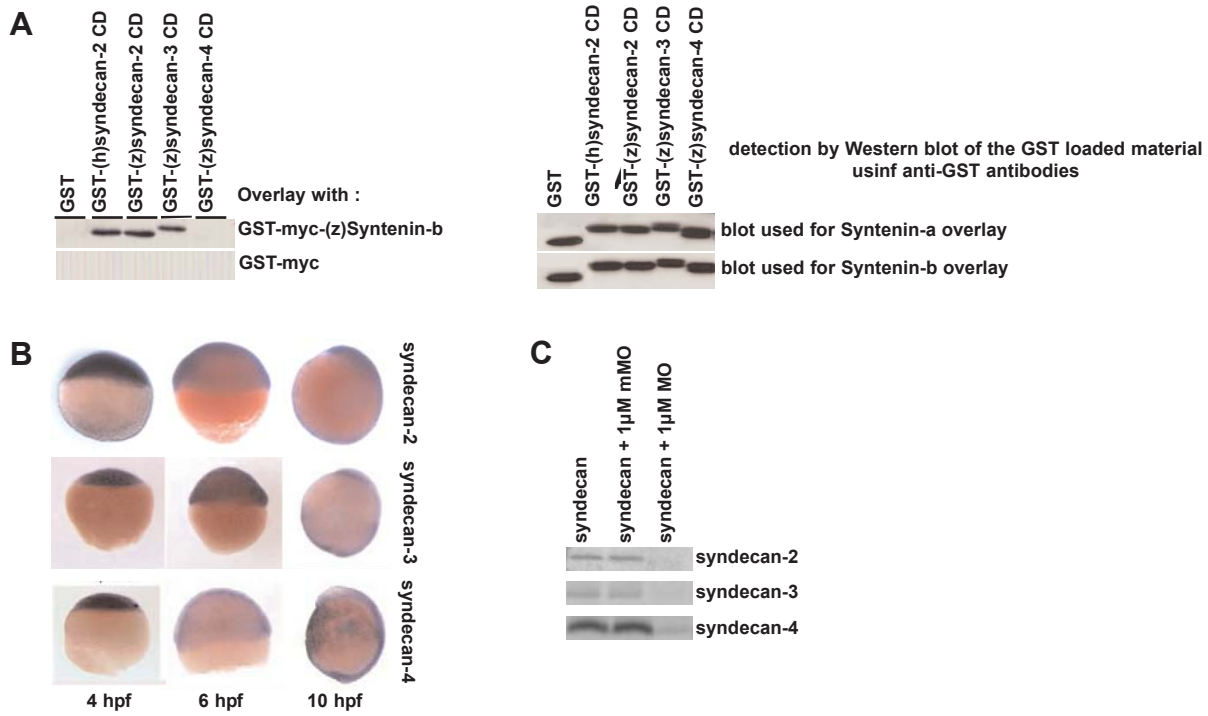

**Fig. S4 (A)** (Left) Ligand overlay illustrating the binding of GST-myc-Syntenin-b (upper panel) to various syndecan cytoplasmic domains and the absence of binding of GST-myc (lower panel). (Right) Control experiment by Western blot with anti-GST antibodies showing that similar amounts, of GST and GST-syndecan cytoplasmic domains were loaded for the overlays with GST-Syntenin-a (upper panel) or GST-Syntenin-b (lower panel). **(B)** WISH experiment showing the broad spatio-temporal expression of the different zebrafish syndecans at sphere (4 hpf), shield (6 hpf) and bud (10 hpf) stages. **(C)** In vitro transcription-translation experiment showing the activity of the MOs for the different syndecans and the ineffectiveness of their mismatch controls (mMO).
